# Supplementary material for: The role of parental health and distress in assessing children’s health status
Source: Qual Life Res. 2022 Jul 25;31(12):3403–12. doi: 10.1007/s11136-022-03186-z (PMC9587925; doi:10.1007/s11136-022-03186-z)
Supplement: Supplementary file 2 — Supplementary file2 (DOCX 23 kb) [file 11136_2022_3186_MOESM2_ESM.docx]

**Appendix B. Correlation of *parent*-reported baseline CHRIS2.0 measures of child’s health with parent’s own health (n=364)1**

| *Parent*-reported  CHRIS2.0 measures of child’s health | *Parent*-reported personal health-status measures | | | | |
| --- | --- | --- | --- | --- | --- |
| (1) Physical health composite2 | (2) Mental health composite3 | (3) Overall composite4 | (4) Parental distress5 | (5) QLRS-P6 |
| - CHRIS 2.0 Physical health composite | .30*** | .14** | .27*** | -.31** | .00 |
| - CHRIS 2.0 Mental health composite | .26*** | .40*** | .39*** | -.50*** | .35*** |
| - CHRIS 2.0 Overall composite | .32*** | .29*** | .37*** | -.45*** | .18*** |
| - QLRS-C7 | .22*** | .35*** | .33*** | -.35*** | .51*** |

*p<0.05
 **p<0.01

***p<0.001

1Table entries are Pearson product correlation coefficients

27-item composite of physical function, role function, social function, cognitive function and energy/vitality, paralleling the CHRIS2.0 child physical health composite; scores range from 0-100

310-item composite of 5 items from the CES-D 20-item measure31,32 and the 5 item mental health measure from the SF-3633,34, paralleling the content for the CHRIS2.0 mental health composite scores, ranging from 0-100, with higher scores meaning better health

4The overall composite for the parent-reported personal health status measure combines physical and mental health composites into a single score, ranging from 0-100, with higher scores meaning better health

5A composite 4-item measure of parental distress based on frequency of worry over or burden from a child’s physical or emotional health, rated on a 5-point Likert scale, ranging from “All of the time” to “None of the time,” transformed to range from 0-100 with high scores meaning more distress30

6The quality of life rating scale for parents (QLRS-P) is an 8-item measure asking parents to rate their quality of work life, family life, friendships, sex life, daily routine, health personal/leisure/social item and general life on a 5-point Likert scale ranging from “Excellent” to “Poor,” with higher scores meaning better quality of life35

7The quality of life rating scale for children (QLRS-C) is a composite 8-item measure of the *parent’s* ratings of the child’s physical health, mental health, family life, friendships, school work, self-confidence, playtime or fun, and general life enjoyment on a 5-point Likert scale ranging from “Excellent” to “Poor,” transformed to range from 0-100 with higher scores meaning higher quality of life
